# Supplementary material
Source: PubMed Central journal article supplement (PMC3719752)
Supplement: AAC.00622-13_zac999102055so1.pdf [file AAC.00622-13_zac999102055so1.pdf]

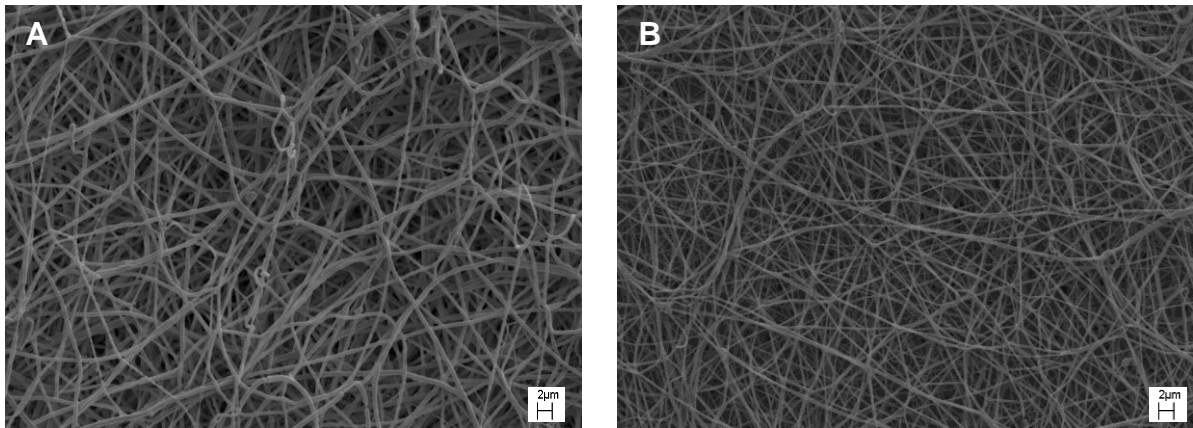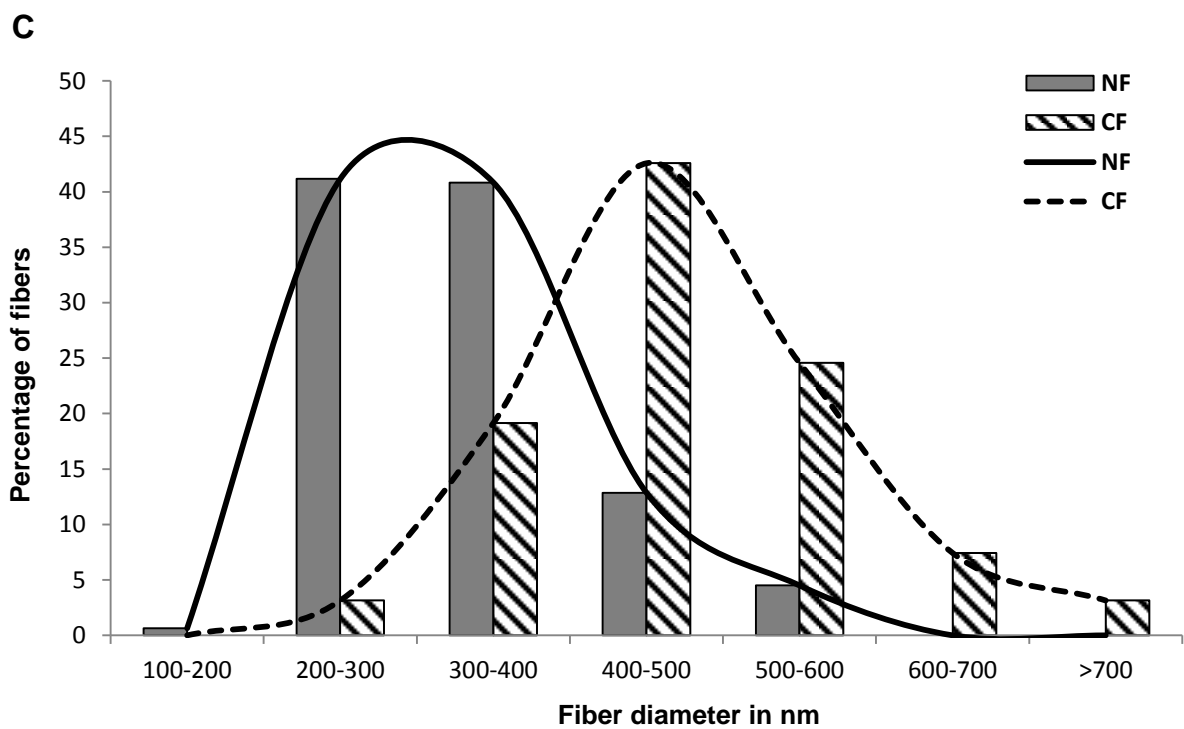

**FIG S1** Scanning electron microscopy (SEM) images of nanofibers and nanofiber diameters. SEM images of PEO 50:PDLLA 50 nanofibers electrospun (A) without nisin and (B) electrospun with nisin. Distribution of nanofiber diameters in samples electrospun without nisin (CF) and with nisin (NF) are shown in (C).

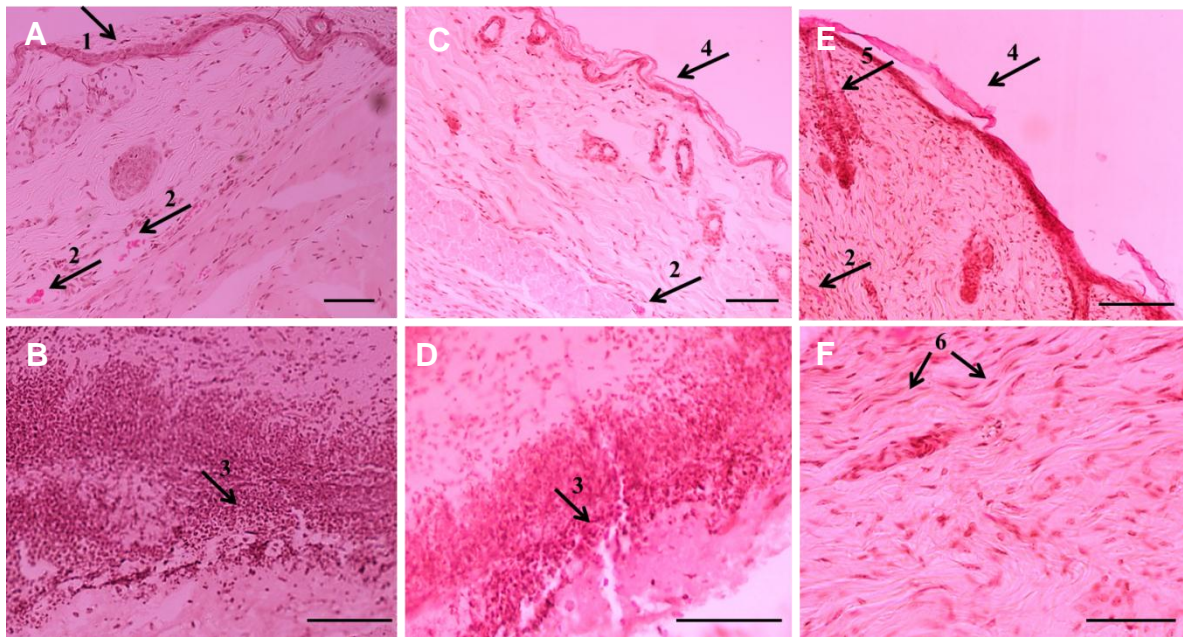

**FIG S2** Histological analysis of non-infected full-thickness excisional wounds in mice covered with gauze, nisin-eluting- and control-PEO 50:PDLLA 50 nanofiber wound dressings to investigate wound healing. Skin sections (stained with H&E) of excisional wounds covered with gauze (A: wound bed and B: tissue adjacent to wound bed), control PEO 50:PDLLA 50 nanofibers (C: wound bed and D: tissue adjacent to wound bed) and nisin-containing nanofibers (E and F, both of wound bed) on day 7. 1: re-epithelialization, 2: neovascularization, 3: neutrophils, 4: keratinization, 5: hair follicle and 6: fibrosis (fibrotic scar formation). Scale bar = 20  $\mu\text{m}$ .
